# Supplementary material for: A Tox21 Approach to Altered Epigenetic Landscapes: Assessing Epigenetic Toxicity Pathways Leading to Altered Gene Expression and Oncogenic Transformation In Vitro
Source: MDPI journal article supplement (doi:10.3390/ijms18061179), 2017-06-01
Supplement: s1 [file s1]

List of abbreviations

| Name     | Description                                                                                                                                                |
|----------|------------------------------------------------------------------------------------------------------------------------------------------------------------|
| 53BP1    | Tumor protein p53 binding protein 1                                                                                                                        |
| 2-HG     | 2-hydroxyglutarate                                                                                                                                         |
| 3-MCA    | 3-methylcholanthrene                                                                                                                                       |
| 5-Aza-dC | 5-aza-2'-deoxycytidine                                                                                                                                     |
| 5caC     | 5-Carboxylcytosine                                                                                                                                         |
| 5fC      | 5-Formylcytosine                                                                                                                                           |
| 5hmC     | 5-Hydroxymethylcytosine                                                                                                                                    |
| 5mC      | 5-methylcytosine                                                                                                                                           |
| ac       | acetylation                                                                                                                                                |
| ADD      | ATRX-Dnmt3-Dnmt3L                                                                                                                                          |
| ADP      | Adenosine diphosphate                                                                                                                                      |
| AKT      | Serine/threonine protein kinase. Originally, the letter "A" and "K" were to identify stocks of mice whereas "T" was to identify a transforming retrovirus. |
| AML      | Acute myeloid leukemia                                                                                                                                     |
| ANRIL    | Antisense non-coding RNA in the INK4 locus                                                                                                                 |
| AP-1     | Activator protein 1                                                                                                                                        |
| Apc      | Adenomatous polyposis coli                                                                                                                                 |
| ARF      | ADP-ribosylation factor                                                                                                                                    |
| Arg      | Arginine                                                                                                                                                   |
| ASH1/2   | Absent, small, or homeotic discs 1/2                                                                                                                       |
| ASH1L    | ASH1 like histone lysine methyltransferase                                                                                                                 |
| Ash2L    | ASH2 like histone lysine methyltransferase                                                                                                                 |
| ATM      | Ataxia telangiectasia gene mutated serine/threonine kinase                                                                                                 |
| ATP      | Adenosine triphosphate                                                                                                                                     |
| ATR      | Ataxia telangiectasia and Rad3 related serine/threonine kinase                                                                                             |
| ATRX     | Alpha-thalassemia and mental retardation X-linked                                                                                                          |
| Aurora B | Aurora kinase B                                                                                                                                            |
| AXIN2    | Axin 2                                                                                                                                                     |
| BAF      | B-associated fitness                                                                                                                                       |
| BAZ2 A/B | Bromodomain adjacent to zinc finger 2A/2B                                                                                                                  |
| BER      | Base excision repair                                                                                                                                       |
| BMI-1    | BMI1 proto-oncogene, polycomb ring finger                                                                                                                  |
| BMP      | Bone morphogenetic protein                                                                                                                                 |
| BPA      | Bisphenol A                                                                                                                                                |
| BPDE     | Benzo[a]pyrene diol epoxide                                                                                                                                |
| B-RAF    | B-Raf proto-oncogene, serine/threonine kinase                                                                                                              |
| BRCA1    | Breast cancer 1, DNA repair associated                                                                                                                     |

|         |                                                                                                                                                                                                                         |
|---------|-------------------------------------------------------------------------------------------------------------------------------------------------------------------------------------------------------------------------|
| BRCT    | BRCA1 C Terminus                                                                                                                                                                                                        |
| BRG1    | Brahma-related gene-1                                                                                                                                                                                                   |
| CAF1    | Chromatin assembly factor 1                                                                                                                                                                                             |
| CBP     | CREB binding protein                                                                                                                                                                                                    |
| CBX     | Chromodomain-containing CBX family proteins                                                                                                                                                                             |
| CD44    | CD refers to cluster of differentiation, also known as cluster of designation or classification determinant. The numbering system is used for the identification and investigation of different cell surface molecules. |
| Cdh1    | Cadherin 1                                                                                                                                                                                                              |
| CDK     | Cyclin-dependent kinase                                                                                                                                                                                                 |
| CDKN    | Cyclin dependent kinase inhibitor                                                                                                                                                                                       |
| CHD     | Chromodomain helicase DNA binding protein                                                                                                                                                                               |
| ChIP    | Chromatin immunoprecipitation                                                                                                                                                                                           |
| CIP1    | Cyclin-dependent kinase inhibitor                                                                                                                                                                                       |
| CMV     | Cytomegalovirus                                                                                                                                                                                                         |
| c-myc   | MYC proto-oncogene                                                                                                                                                                                                      |
| CoREST  | Repressor element-1 silencing transcription factor corepressor 1                                                                                                                                                        |
| CpG     | 5'—Cytosine—phosphate—Guanine—3'                                                                                                                                                                                        |
| CRABP2  | Cellular Retinoic Acid Binding Protein 2                                                                                                                                                                                |
| CRBP1   | Cellular retinol binding protein 1                                                                                                                                                                                      |
| CREB    | cAMP response element-binding protein                                                                                                                                                                                   |
| CTCF    | CCCTC-binding factor                                                                                                                                                                                                    |
| CTIP2   | COUP-TF-interacting protein 2                                                                                                                                                                                           |
| CUL4    | Cullin 4                                                                                                                                                                                                                |
| CxxC5/1 | CXXC finger protein 5/1                                                                                                                                                                                                 |
| CYP26A1 | Cytochrome P450 family 26 subfamily A member 1                                                                                                                                                                          |
| DAPI    | 4',6-diamidino-2-phenylindole                                                                                                                                                                                           |
| DDB1    | DNA damage-binding protein 1 i                                                                                                                                                                                          |
| DES     | Desmin                                                                                                                                                                                                                  |
| dG      | Deoxyguanosine                                                                                                                                                                                                          |
| DKK1-4  | Dickkopf WNT signaling pathway inhibitors 1-4                                                                                                                                                                           |
| Dlx-1-6 | Distal-less homeobox proteins 1-6                                                                                                                                                                                       |
| DMRs    | Differentially methylated regions                                                                                                                                                                                       |
| DMSO    | Dimethyl sulfoxide                                                                                                                                                                                                      |
| DNA     | Deoxyribonucleic acid                                                                                                                                                                                                   |
| DNMT    | DNA (cytosine-5)-methyltransferase                                                                                                                                                                                      |
| DUSP1-5 | Dual specificity phosphatases 1-5                                                                                                                                                                                       |
| E2F     | E2F transcription factor                                                                                                                                                                                                |
| E3      | Ubiquitin-protein ligase                                                                                                                                                                                                |

|           |                                                           |
|-----------|-----------------------------------------------------------|
| EED       | Embryonic ectoderm development                            |
| EGFP      | Enhanced Green Fluorescent Protein                        |
| EGFR      | Epidermal growth factor receptor                          |
| EHMT1/2   | Euchromatic histone lysine methyltransferase 1/2          |
| ELISA     | Enzyme-linked immunosorbent assay                         |
| EMT       | Epithelial-to-mesenchymal transition                      |
| ENCODE    | Encyclopedia of DNA Elements                              |
| Engrailed | Engrailed homeobox 2                                      |
| Ep-CAM    | Epithelial cell adhesion molecule                         |
| EphB2     | EPH receptor B2                                           |
| ERK       | Extracellular regulated MAP kinase                        |
| esBAF     | Embryonic stem cell BRG1 ATPase associated factor         |
| ESC       | Embryonic stem cells                                      |
| ESET      | Erg-associated protein with SET domain                    |
| EZH1-2    | Enhancer of zeste 1 polycomb repressive complex 2 subunit |
| FA        | Folic acid                                                |
| FAD       | Flavin adenine dinucleotide                               |
| FGF       | Fibroblast growth factor                                  |
| G1        | Cell cycle Gap 1 phase                                    |
| G9a       | Histone methyltransferase                                 |
| GAD1      | Glutamic acid decarboxylase 1                             |
| GADD34    | Growth arrest and DNA damage 34                           |
| GFP       | Green fluorescent protein                                 |
| GLP       | Glucagon-like peptide-1                                   |
| Gstp1     | Glutathione S-transferase pi 1                            |
| H1        | Histone protein 1                                         |
| H19       | Long non-coding RNA                                       |
| H2A       | Histone protein 2A                                        |
| H2A.Z     | H2A histone family member Z                               |
| H2AX      | Histone protein 2AX                                       |
| H2B       | Histone protein 2B                                        |
| H3        | Histone protein 3                                         |
| H3S10p    | Histone H3 serine 10 phosphorylation                      |
| H4        | Histone protein 4                                         |
| Ha-ras    | Harvey Ras proto-oncogene, GTPase                         |
| HCC       | Hepatocellular carcinoma                                  |
| HDAC      | Histone deacetylases                                      |
| HDMs      | Histone demethylases                                      |
| HIC1      | Hypermethylated in cancer 1                               |

|             |                                                                        |
|-------------|------------------------------------------------------------------------|
| HMEC        | Human Mammary Epithelial Cells                                         |
| HMGA2       | High mobility group at-hook 2                                          |
| HMT         | Histone methyltransferase                                              |
| HOTAIR      | HOX transcript antisense RNA                                           |
| HOX         | Homeobox                                                               |
| HP1         | Heterochromatin protein 1                                              |
| HpaII       | Restriction endonuclease, Haemophilus parainfluenzae                   |
| HPC1 - 3    | Human polycomb 1-3                                                     |
| HPH1 - 3    | Polyhomeotic homolog 1-3                                               |
| HPTM        | Histone post-translational modifications                               |
| HPV E7      | Human papilloma virus E7 oncoprotein                                   |
| hSETD1A/1B  | Human SET domain containing 1A/1B                                      |
| hSNF5       | Human Sucrose Non-Fermentable 5                                        |
| hTERT       | Human telomerase reverse transcriptase                                 |
| ICF         | Immunodeficiency, centromeric region instability, and facial anomalies |
| IDH 1-2     | Isocitrate dehydrogenases 1-2                                          |
| IGF         | Insulin like growth factor                                             |
| ING         | Inhibitor of growth                                                    |
| INK4a       | Inhibitor of cyclin-dependent kinase 4a                                |
| INK4b       | Inhibitor of cyclin-dependent kinase 4b                                |
| INO81       | Inositol requiring 80                                                  |
| iPSC        | Induced pluripotent stem cell                                          |
| ISWI        | Imitation Switch, Chromatin Remodeling                                 |
| Jak2        | Janus kinase 2                                                         |
| JARID1a/1b  | Jumonji AT-rich interactive domain 1a/1b                               |
| Jhdm1b      | JmjC domain-containing histone demethylase 1b                          |
| JMJD        | Jumonji domain containing protein                                      |
| K           | Lysine                                                                 |
| KAT         | Lysine acetyl transferases                                             |
| KDM         | Lysine demethylases                                                    |
| Kip2        | Kinesin-like protein 2                                                 |
| KISS1       | Kisspeptin-1, Metastasis-Suppressor                                    |
| KMT         | lysine methyltransferases                                              |
| KO          | knockout                                                               |
| LEF         | Lymphoid enhancer binding factor                                       |
| Let-7c      | MicroRNA let-7c                                                        |
| LHX         | LIM/homeobox protein                                                   |
| lincRNAs    | Long intergenic non-coding RNAs                                        |
| lipocalin-2 | LCN2                                                                   |

|              |                                                                       |
|--------------|-----------------------------------------------------------------------|
| LSD1         | Lysine-specific histone demethylase 1                                 |
| MAL          | mal, T-cell differentiation protein                                   |
| MAP          | Mitogen-activated protein kinase                                      |
| MBD          | methyl-CpG- binding domain                                            |
| MBLR         | MEL18- and BMI1-like ring finger protein                              |
| MCAF1        | MBD1-containing chromatin-associated factor 1                         |
| mCpA         | Methylated 5'—C—phosphate—A—3'                                        |
| mCpC         | Methylated 5'—C—phosphate—C—3'                                        |
| mCpT         | Methylated 5'—C—phosphate—T—3'                                        |
| MDM2         | Mouse double minute 2                                                 |
| me1          | monomethylation                                                       |
| me2          | dimethylation                                                         |
| me3          | trimethylation                                                        |
| MeC/DAPI     | 5-methylcytosine(Mec) /4,6-diamidino-2-phenylindole (DAPI)            |
| MeCP2        | Methyl CpG binding protein 2                                          |
| MEFs         | Mouse Embryonic Fibroblasts                                           |
| MEK          | Mitogen-activated protein kinase kinases (also known as MAP2K, MAPKK) |
| MEL18        | Polycomb Group RING finger Protein                                    |
| MGMT         | O-6-Methylguanine-DNA Methyltransferase                               |
| Mi-2         | Chromodomain-helicase-DNA-binding protein                             |
| miR          | MicroRNA                                                              |
| MIR31HG      | MicroRNA-31 host gene                                                 |
| MLH1         | MutL homolog 1, colon cancer, nonpolyposis type 2 (E. coli)           |
| MLL 1-4      | Acute lymphoblastic leukemia 1-4, aliases for KMT2A Gene              |
| MMA          | Methyl Methacrylate                                                   |
| MMP7         | Matrix metalloproteinase-7                                            |
| MMTV         | Mouse mammary tumor virus                                             |
| MNU          | N-Methyl-N-Nitrosourea                                                |
| MOZ          | Monocytic leukemia zinc-finger protein                                |
| MPP8         | M-phase phosphor protein 8                                            |
| MSH 2-6      | DNA mismatch repair protein Msh2-6                                    |
| MYSM1        | myb-like, SWIRM and MPN domains 1                                     |
| MYST3        | MYST histone acetyltransferase (monocytic leukemia) 3                 |
| NAD          | Nicotinamide-adenine dinucleotide                                     |
| NANOG        | Nanog homeobox Gene                                                   |
| NCATS        | The National Center for Advancing Translational Sciences              |
| NDR          | Nucleosome depleted region                                            |
| Next Gen Seq | Next-generation sequencing                                            |

|              |                                                                                                                                                                                       |
|--------------|---------------------------------------------------------------------------------------------------------------------------------------------------------------------------------------|
| NoRC         | Nucleolar remodeling complex                                                                                                                                                          |
| NOTCH        | Notch (DSL) proteins                                                                                                                                                                  |
| NSPC1        | Polycomb group RING finger protein 1                                                                                                                                                  |
| NURD         | Nucleosome remodeling deacetylase                                                                                                                                                     |
| OCT4         | octamer-binding transcription factor 4                                                                                                                                                |
| OGG1         | 8-oxoguanine DNA glycosylase                                                                                                                                                          |
| OHdG         | 8-hydroxy-2'-deoxyguanosine                                                                                                                                                           |
| OIS          | Oncogene induced senescence                                                                                                                                                           |
| OLIGO2       | Oligodendrocyte transcription factor                                                                                                                                                  |
| p107         | 107 kDa retinoblastoma-associated protein                                                                                                                                             |
| p120-catenin | Prototypic member of a subfamily of Armadillo-domain proteins                                                                                                                         |
| p130         | 130 kDa retinoblastoma-associated protein                                                                                                                                             |
| p14          | Tumour suppressor protein also called ARF or p14 <sup>ARF</sup> . It is a 14 kDa protein in human encoded from the INK4a/ARF or CDKN2A locus.                                         |
| p15/INK4B    | Cyclin-dependent kinase inhibitor 2B (CDKN2B or p15, p15 <sup>INK4b</sup> , and inhibits CDK4)                                                                                        |
| p16          | Cyclin-dependent kinase inhibitor 2A (or p16INK4a, a 16 kDa tumour suppressor protein encoded from the INK4a/ARF or CDKN2A locus). It inhibits CDK4 and CDK6.                         |
| p21          | Cyclin-dependent kinase inhibitor 1 from the CDKN1A gene. A 21 kDa protein associated primarily with inhibition of CDK2. Also known as p21 <sup>Cip1</sup> , or p21 <sup>Waf1</sup> . |
| p300         | Histone acetyltransferase p300                                                                                                                                                        |
| p53          | Tumor Protein P53                                                                                                                                                                     |
| p53BP2       | Tumour suppressor p53-binding protein 2                                                                                                                                               |
| p57/Kip2     | Cyclin-dependent kinase inhibitor belonging to the CIP/KIP family                                                                                                                     |
| PARG         | Poly(ADP-ribose) glycohydrolase                                                                                                                                                       |
| PARP1/2      | Poly [ADP-ribose] polymerase 1/2                                                                                                                                                      |
| PAX          | Paired box                                                                                                                                                                            |
| PcG          | Polycomb group                                                                                                                                                                        |
| PCNA         | Proliferating cell nuclear antigen                                                                                                                                                    |
| PCR          | Polymerase chain reaction                                                                                                                                                             |
| PDGFRA       | Platelet-derived growth factor receptor A                                                                                                                                             |
| PGC          | Primordial germ cells                                                                                                                                                                 |
| PHD          | Plant homeodomain                                                                                                                                                                     |
| PI3K         | Phosphatidylinositol-4,5-bisphosphate 3-kinase                                                                                                                                        |
| PKC          | Protein kinase C                                                                                                                                                                      |
| PoT          | Pathway of Toxicity                                                                                                                                                                   |
| PPP1R15A     | Protein Phosphatase 1 Regulatory Subunit 15A                                                                                                                                          |

|               |                                                                                          |
|---------------|------------------------------------------------------------------------------------------|
| pRB           | Retinoblastoma protein                                                                   |
| pRB-P         | Phosphorylated retinoblastoma protein                                                    |
| PRC1-4        | Polycomb repressive complexes 1- 4                                                       |
| PRDM2         | PR domain zinc finger protein 2                                                          |
| PRMT          | Protein Arginine methyltransferases                                                      |
| PTEN          | Phosphatase and tensin homolog                                                           |
| PTM           | Post translational modification                                                          |
| PWWP          | PWWP domain (Pro-Trp-Trp-Pro residues)                                                   |
| qHTS          | Quantitative high-throughput screening                                                   |
| qRT-PCR       | Quantitative Reverse Transcription PCR                                                   |
| R             | Arginine                                                                                 |
| RAF           | Serine/threonine kinase; Rapidly Accelerated Fibrosarcoma (can be a-, b-c-, or v-RAF)    |
| RAR $\beta$ 2 | Retinoic acid receptor beta 2                                                            |
| RAR $\alpha$  | Retinoic acid receptor alpha                                                             |
| RAS           | proto-oncogene, member of the Ras superfamily of proteins, GTPase                        |
| RASL – Seq    | RNA-mediated oligonucleotide Annealing, Selection, and Ligation with Next-Gen sequencing |
| RassF1        | RAS association domain family 1                                                          |
| Rb            | Retinoblastoma                                                                           |
| RBBP4-5       | Retinoblastoma binding protein 4-5                                                       |
| rDNA          | Ribosomal DNA                                                                            |
| REST          | Repressor element-1 silencing transcription factor                                       |
| Rfx5          | Regulatory factor X5                                                                     |
| Rfxank        | Regulatory factor X associated ankyrin containing protein                                |
| Rfxap         | Regulatory factor X associated protein                                                   |
| Ring1A        | Ring finger protein 1A                                                                   |
| RNA           | Ribonucleic acid                                                                         |
| RNF2          | Ring finger protein 2                                                                    |
| ROS           | Reactive oxygen species                                                                  |
| S             | Serine                                                                                   |
| SAM           | S-adenosyl-L-methionine                                                                  |
| SCML1-2       | Sex comb on midleg zinc-finger protein 1-2                                               |
| SET1          | Su (var) 3-9, Enhancer-of-zeste and Trithorax1                                           |
| SETD1A/1B     | Su (var) 3-9, Enhancer-of-zeste and Trithorax domain 1A/1B                               |
| SETDB 1-2     | Su (Var) 3-9, enhancer of Zeste, Thrithorax domain, bifurcated 1-2                       |
| SFRP5         | Secreted frizzled related protein 5                                                      |
| SHE           | Syrian hamster embryo cells                                                              |
| Shh           | Sonic hedgehog                                                                           |
| shRNA         | Short hairpin RNA                                                                        |

|            |                                                                                                                 |
|------------|-----------------------------------------------------------------------------------------------------------------|
| SIPS       | Stress-induced premature senescence                                                                             |
| siRNA      | Short interfering RNA                                                                                           |
| SIRT1      | Sirtuin 1                                                                                                       |
| SIS        | Stress-induced senescence                                                                                       |
| SIX        | SIX homeobox                                                                                                    |
| SMARCAD1   | SWI/SNF-related, matrix-associated actin-dependent regulator of chromatin, subfamily a, containing DEAD/H box 1 |
| Sncg       | Synuclein-gamma                                                                                                 |
| SNF5       | Subunit of the SWI/SNF chromatin remodeling complex                                                             |
| SOX2       | SRY-Box 2                                                                                                       |
| S-phase    | Cell cycle synthesis phase                                                                                      |
| SPRY2/4    | Sprouty 2/4                                                                                                     |
| SRA        | Set and RING finger-associated                                                                                  |
| SRY        | Sex Determining Region Y                                                                                        |
| ssDNA      | single-stranded DNA                                                                                             |
| SUV39H1/H2 | Suppressor of variegation 39 homolog family 1/2                                                                 |
| SUZ12      | Suppressor of zeste-12                                                                                          |
| SWI        | SWItching deficient                                                                                             |
| SWR1       | ATP-dependent chromatin-remodeling complex                                                                      |
| T          | Threonine                                                                                                       |
| TCDD       | 2,3,7,8-Tetrachlorodibenzo-p-dioxin                                                                             |
| TCF        | T cell-specific transcription factor                                                                            |
| TET        | Ten Eleven Translocation enzyme                                                                                 |
| TG:meCG    | Thymine-guanine:methylated cytosine-guanine                                                                     |
| TGF        | transforming growth factor                                                                                      |
| TIP5       | Tonoplast intrinsic protein 5                                                                                   |
| Tox21      | Toxicology in the 21st Century                                                                                  |
| TP53       | Tumor Protein P53                                                                                               |
| TrxG       | Trithorax group                                                                                                 |
| TSG        | Tumour suppressor genes                                                                                         |
| TSS        | Transcription start site                                                                                        |
| TT21C      | Toxicology Testing in the 21st Century                                                                          |
| TUCP       | Transcripts of uncertain coding potential                                                                       |
| Twist      | Reposition of chromatin remodeling complexes                                                                    |
| ub         | Ubiquitinated                                                                                                   |
| UG:meCG    | Uracil-guanine:methylated cytosine-guanine                                                                      |
| UHRF       | Ubiquitin-like, containing plant homeodomain (PHD) and RING finger domain                                       |
| UIM        | Ubiquitin interacting motif                                                                                     |
| UTX        | Ubiquitously transcribed tetratricopeptide repeat, X chromosome                                                 |



|              |                                                                       |
|--------------|-----------------------------------------------------------------------|
| vHMEC        | Variant human mammary epithelial cells                                |
| v-myc        | Myelocytomatosis viral oncogene                                       |
| WAF1         | Wildtype p53-activated fragment 1 (Cyclin-dependent kinase inhibitor) |
| WDR5         | WD (trp-asp) repeat domain 5                                          |
| WH           | Winged-helix                                                          |
| Wnt          | Wingless-type MMTV integration site family                            |
| Wnt5a        | Wnt family member 5A                                                  |
| ZBTB         | Zinc finger and BTB domain (bric-à-brac, tramtrack and broad complex) |
| ZF-CW        | Zinc finger motif, cysteine and tryptophan residues                   |
| ZFP57        | Zinc finger protein 57                                                |
| $\alpha$ -kg | $\alpha$ -ketoglutarate                                               |
