# Supplementary material for: A Tox21 Approach to Altered Epigenetic Landscapes: Assessing Epigenetic Toxicity Pathways Leading to Altered Gene Expression and Oncogenic Transformation In Vitro
Source: Int J Mol Sci. 2017 Jun 1;18(6):1179. doi: 10.3390/ijms18061179 (PMC5486002; doi:10.3390/ijms18061179)
Supplement: Supplementary file 1 [file ijms-18-01179-s001.zip]

Archive with 4 entries (4 files):
- SUPPLEMENTARY SECTION _Text S2.pdf
- List of abbreviations.pdf
- SUPPLEMENTARY SECTION _Table S1.pdf
- SUPPLEMENTARY SECTION _Text S1.pdf
